# Supplementary material for: Review of Existing Knowledge and Practices of Tarping for the Control of Invasive Knotweeds
Source: Plants (Basel). 2021 Oct 11;10(10):2152. doi: 10.3390/plants10102152 (PMC8539117; doi:10.3390/plants10102152)
Supplement: Supplementary file 1 [file plants-10-02152-s001.zip › Supplementary 3.pdf]

### Supplementary 3. List of tarping operations identified through the questionnaire and their main characteristics.

|    | City and country of the tarping operation | Date of tarp laying | Stand area (m2) | Type of tarp used                   | Tarp material | Distance from the stand edge covered by the tarp (m) | Tarp removal (duration of tarping) | Evaluation of effectiveness at tarp removal (0 = ineffective / 10 = very effective) |
|----|-------------------------------------------|---------------------|-----------------|-------------------------------------|---------------|------------------------------------------------------|------------------------------------|-------------------------------------------------------------------------------------|
| 1  | Chalon-sur Saône (71), France             | 2017                | 2               | Geotextile                          | Synthetic     | 1                                                    | Not yet                            | n/a                                                                                 |
| 2  | Chalon-sur Saône (71), France             | 2018                | 1000            | Geotextile                          | Synthetic     | 2                                                    | Not yet                            | n/a                                                                                 |
| 3  | Moux en Morvan (71), France               | 2012                | 10              | Geotextile                          | n/a           | 1                                                    | No                                 | n/a                                                                                 |
| 4  | Merville (14), France                     | 2015                | 60              | Geomembrane                         | Synthetic     | 5                                                    | No                                 | n/a                                                                                 |
| 5  | Crépol (26), France                       | 2008                | 15              | Agricultural tarpaulin              | Synthetic     | 1                                                    | No                                 | n/a                                                                                 |
| 6  | ? (88), France                            | 2017                | 10              | Agricultural tarpaulin              | Synthetic     | 0,5                                                  | Yes (1 year)                       | 2                                                                                   |
| 7  | Sens (89), France                         | 2018                | 3               | Other                               | Synthetic     | 2                                                    | Not yet                            | n/a                                                                                 |
| 8  | Arles sur Tech (66), France               | 2015                | 10              | Agricultural tarpaulin              | Synthetic     | 1                                                    | Yes (2 years)                      | 10                                                                                  |
| 9  | Orcival (63), France                      | 2015                | 100             | Other                               | n/a           | 0,5                                                  | No                                 | n/a                                                                                 |
| 10 | Ouessant (29), France                     | 2016                | 300             | Agricultural tarpaulin              | Synthetic     | 1                                                    | Not yet                            | n/a                                                                                 |
| 11 | Sequedin (59), France                     | 2015                | 10              | Geotextile                          | PLA           | 2                                                    | No                                 | n/a                                                                                 |
| 12 | La Terrasse sur Dorlay (42), France       | 2014                | 300             | Agricultural tarpaulin              | Synthetic     | n/a                                                  | Yes (3 years)                      | 10                                                                                  |
| 13 | Laguiole (12), France                     | 2013                | 300             | Geomembrane                         | Synthetic     | 1                                                    | Not yet                            | n/a                                                                                 |
| 14 | Estouy (45), France                       | 2016                | 300             | Agricultural tarpaulin              | Synthetic     | 2                                                    | No                                 | n/a                                                                                 |
| 15 | Cour Cheverny (41), France                | 2005                | 50              | Geotextile                          | Biodegradable | 0,5                                                  | No                                 | n/a                                                                                 |
| 16 | Yffiniac (22), France                     | 2015                | 35              | Geotextile                          | Biodegradable | 0,5                                                  | No                                 | n/a                                                                                 |
| 17 | Harfleur (76), France                     | 2014                | 225             | Geotextile                          | Synthetic     | 0                                                    | Yes (1 year)                       | 7                                                                                   |
| 18 | Annemasse (74), France                    | 2020                | 245             | Geotextile                          | n/a           | 2                                                    | Not yet                            | n/a                                                                                 |
| 19 | Ragny-Usé (37), France                    | 2018                | 100             | Geotextile                          | Biodegradable | 1                                                    | Not yet                            | n/a                                                                                 |
| 20 | Combourg (35), France                     | 2009                | 50              | Agricultural tarpaulin              | Synthetic     | 0                                                    | No                                 | n/a                                                                                 |
| 21 | Douy (28), France                         | 2014                | 50              | Geomembrane                         | Synthetic     | 0,5                                                  | No                                 | n/a                                                                                 |
| 22 | Chateaudun (28), France                   | 2015                | 30              | Geomembrane                         | n/a           | 0,3                                                  | Yes (2 years)                      | 2                                                                                   |
| 23 | Jonchery sur Vesle (51)                   | n/a                 | 40              | Geotextile                          | n/a           | 1                                                    | Yes (5 years)                      | 10                                                                                  |
| 24 | La Bourboule (63)                         | 2006                | 360             | Other                               | Synthetic     | n/a                                                  | Yes (2 years)                      | n/a                                                                                 |
| 25 | Vignieu (38)                              | 2020                | 10              | Agricultural tarpaulin              | Synthetic     | 2                                                    | Not yet                            | n/a                                                                                 |
| 26 | Ploubazlanec (22)                         | 2020                | 500             | Agricultural tarpaulin + Geotextile | Synthetic     | 2                                                    | No                                 | n/a                                                                                 |
| 27 | Cessieu (38), France                      | 2019                | 450             | Geotextile                          | Synthetic     | 1                                                    | Not yet                            | n/a                                                                                 |
| 28 | St Cosme en Vairais (72), France          | 2015                | 20              | Agricultural tarpaulin + Geotextile | Synthetic     | 2                                                    | Yes (5 years)                      | 8                                                                                   |
| 29 | Lac de Sève (38), France                  | 2018                | 75              | Geotextile                          | n/a           | 2                                                    | Not yet                            | n/a                                                                                 |
| 30 | Crépieux-la-Pape (38)                     | 2019                | 5000            | Geotextile                          | Synthetic     | 2                                                    | Not yet                            | n/a                                                                                 |
| 31 | Montceau les Mines (71), France           | 2010                | 2000            | Geotextile                          | Synthetic     | 1                                                    | No                                 | n/a                                                                                 |
| 32 | Jarnosse (42), France                     | 2018                | 140             | Agricultural tarpaulin              | Synthetic     | 2                                                    | No                                 | n/a                                                                                 |
| 33 | La Chapelle en Valgaudémar (05)           | n/a                 | 50              | Geomembrane                         | Synthetic     | 0,5                                                  | Yes (5 years)                      | 10                                                                                  |
| 34 | Saint Laurent (31), France                | 2017                | 1000            | Geotextile                          | Synthetic     | 2                                                    | No                                 | n/a                                                                                 |
| 35 | Fort Mahon Plage (80)                     | 2009                | 100             | Geotextile                          | Synthetic     | 1                                                    | No                                 | n/a                                                                                 |
| 36 | Obernai (67), France                      | 2011                | 50              | Geotextile                          | Synthetic     | 5                                                    | No                                 | n/a                                                                                 |
| 37 | Arlon, Belgique                           | 2017                | 50              | Geomembrane                         | Synthetic     | 2                                                    | Not yet                            | n/a                                                                                 |
| 38 | Les Noës (42), France                     | 2008                | 10              | Agricultural tarpaulin              | Synthetic     | 2                                                    | No                                 | n/a                                                                                 |
| 39 | Ernée (53), France                        | 2018                | 60              | Geotextile                          | Biodegradable | n/a                                                  | No                                 | n/a                                                                                 |
| 40 | Ugine (73), France                        | 2018                | 200             | Geomembrane                         | Synthetic     | 1                                                    | Not yet                            | n/a                                                                                 |
| 41 | Vetzie (15), France                       | 2018                | 20              | Agricultural tarpaulin              | Synthetic     | 1                                                    | Not yet                            | n/a                                                                                 |
| 42 | Chalon sur Saône (71), France             | 2018                | 90              | Geotextile                          | Synthetic     | 0                                                    | Not yet                            | n/a                                                                                 |
| 43 | La Bridoire (73), France                  | 2016                | 20              | Geotextile                          | Synthetic     | 1                                                    | Not yet                            | n/a                                                                                 |
| 44 | Tournus (71), France                      | 2015                | 150             | Geomembrane                         | Synthetic     | 0,5                                                  | No                                 | n/a                                                                                 |
| 45 | Cerfontaine, Belgique                     | 2011                | 100             | Other                               | Synthetic     | 0                                                    | No                                 | n/a                                                                                 |
| 46 | Laguiole (12), France                     | 2014                | 30              | Geomembrane                         | Synthetic     | 1                                                    | Not yet                            | n/a                                                                                 |
| 47 | Bonson (42), France                       | 2014                | 40              | Agricultural tarpaulin              | Synthetic     | 2                                                    | Yes (5 years)                      | 9                                                                                   |
| 48 | Lucenay-Févère (71), France               | 2012                | 400             | Geotextile                          | Synthetic     | 1                                                    | Not yet                            | n/a                                                                                 |
| 49 | Lacanau (33), France                      | 2013                | n/a             | Agricultural tarpaulin              | Synthetic     | 1                                                    | Not yet                            | n/a                                                                                 |
| 50 | Chantilly (60), France                    | 2020                | 6               | Agricultural tarpaulin              | Synthetic     | 0                                                    | Not yet                            | n/a                                                                                 |
| 51 | Le Freney d'Oisans (38), France           | 2016                | 30              | Geomembrane                         | Synthetic     | 1                                                    | Not yet                            | n/a                                                                                 |
| 52 | Omon (38), France                         | 2016                | 150             | Geomembrane                         | Synthetic     | 1                                                    | Other                              | n/a                                                                                 |
| 53 | Saint Martin sur le Prê (51), France      | 2014                | n/a             | Geotextile                          | n/a           | n/a                                                  | No                                 | n/a                                                                                 |
| 54 | Lochieu (01), France                      | 2017                | 15              | Agricultural tarpaulin              | Synthetic     | 1                                                    | Not yet                            | n/a                                                                                 |
| 55 | Port-Brillet (53), France                 | 2012                | 4               | Geotextile                          | n/a           | 0                                                    | Yes (2 years)                      | 0                                                                                   |
| 56 | Banassac-Caniillac (48), France           | 2016                | 100             | Agricultural tarpaulin              | Synthetic     | n/a                                                  | No                                 | n/a                                                                                 |
| 57 | Vandoeuve-lès-Nancy (54), France          | 2016                | 400             | Agricultural tarpaulin              | Synthetic     | 1                                                    | Yes (?)                            | n/a                                                                                 |
| 58 | Lunac (12), France                        | 2011                | 55              | Agricultural tarpaulin              | Synthetic     | 1                                                    | No                                 | n/a                                                                                 |
| 59 | Brest (29), France                        | 2015                | 50              | Geomembrane                         | Synthetic     | 2                                                    | n/a                                | n/a                                                                                 |
| 60 | Grandsaigne (19), France                  | 2016                | 30              | Agricultural tarpaulin              | Synthetic     | 1                                                    | No                                 | n/a                                                                                 |
| 61 | Taden (22) France                         | 2003                | 2000            | Geotextile                          | Biodegradable | n/a                                                  | No                                 | n/a                                                                                 |
| 62 | Maulévrier-Sainte-Geotrude (76), France   | 2013                | 50              | Geomembrane                         | Synthetic     | 1                                                    | Yes (5 years)                      | 5                                                                                   |
| 63 | Tancarville (76), France                  | 2009                | 100             | Agricultural tarpaulin              | Synthetic     | 1                                                    | Yes (2 years)                      | 3                                                                                   |
| 64 | Sainte Suzanne (53), France               | 2012                | 6               | Geomembrane                         | Synthetic     | 1                                                    | No                                 | n/a                                                                                 |
| 65 | Evreux (27), France                       | 2018                | 600             | Agricultural tarpaulin              | Synthetic     | 1                                                    | No                                 | n/a                                                                                 |
| 66 | Saint Alban (22), France                  | 2019                | 300             | Geotextile                          | Biodegradable | 2                                                    | No                                 | n/a                                                                                 |
| 67 | Le Havre (76), France                     | 2004                | 600             | Geotextile                          | Synthetic     | n/a                                                  | Yes (8 years)                      | 3                                                                                   |
| 68 | Quimper (29), France                      | 2005                | 200             | Geomembrane                         | Synthetic     | 1                                                    | Yes (10 years)                     | 5                                                                                   |
| 69 | Oullins (69), France                      | 2015                | 150             | Geomembrane                         | Synthetic     | 2                                                    | Yes (5 years)                      | 10                                                                                  |
| 70 | Brionne (27), France                      | 2018                | 150             | Geotextile                          | Synthetic     | n/a                                                  | No                                 | n/a                                                                                 |
| 71 | Château Landon (77), France               | 2017                | 90              | Geotextile                          | Biodegradable | 1,5                                                  | No                                 | n/a                                                                                 |
| 72 | Chilliwack (BC), Canada                   | 2015                | 90              | Geomembrane                         | Synthetic     | 1                                                    | No                                 | n/a                                                                                 |
| 73 | Fredericton (NB), Canada                  | 2017                | 200             | Agricultural tarpaulin              | Synthetic     | 5                                                    | Not yet                            | n/a                                                                                 |
| 74 | Lexington (Massachusetts), USA            | 2005                | 232             | Agricultural tarpaulin              | Synthetic     | n/a                                                  | Yes (4 years)                      | 5                                                                                   |
| 75 | Jessnitz (Saxony-Anhalt), Germany         | 2005                | n/a             | Geotextile                          | Synthetic     | 1,5                                                  | No                                 | n/a                                                                                 |
| 76 | (New Hampshire), USA                      | 2008                | 74              | Agricultural tarpaulin + Geotextile | Synthetic     | 3                                                    | Yes (?)                            | n/a                                                                                 |
| 77 | Buffalo (NY), USA                         | 2011                | 46              | Geotextile                          | Synthetic     | 1,5                                                  | Yes (4 years)                      | 0                                                                                   |
| 78 | Granby (QC), Canada                       | 2015                | 6               | Geomembrane                         | Synthetic     | 2                                                    | Not yet                            | n/a                                                                                 |
| 79 | Bled , Slovenia                           | 2016                | 350             | Geotextile                          | Synthetic     | 1                                                    | Yes (3 years)                      | 10                                                                                  |
| 80 | Watkins Glen (NY), USA                    | 2010                | 111             | Agricultural tarpaulin              | Synthetic     | 1                                                    | No                                 | n/a                                                                                 |
| 81 | Esbek (Landgoed De Utrecht), Nederland    | 2012                | 100             | Geotextile                          | Synthetic     | 5                                                    | Yes (5 years)                      | 0                                                                                   |
